# Supplementary material
Source: ML conference proceedings conference paper supplement (https://openaccess.thecvf.com/content/ICCV2023/html/Wu_Randomized_Quantization_A_ICCV_2023_paper.html)
Supplement: Supplementary file 1 [file Wu_Randomized_Quantization_A_ICCV_2023_supplemental.pdf]

# Randomized Quantization: A Generic Augmentation for Data Agnostic Self-supervised Learning

Huimin Wu<sup>1\*</sup>    Chenyang Lei<sup>2\*</sup>    Xiao Sun<sup>4</sup>    Peng-Shuai Wang<sup>3</sup>  
Qifeng Chen<sup>1</sup>    Kwang-Ting Cheng<sup>1</sup>    Stephen Lin<sup>5</sup>    Zhirong Wu<sup>5</sup>

<sup>1</sup>HKUST    <sup>2</sup>CAIR, HKISI-CAS    <sup>3</sup>Peking University    <sup>4</sup>Shanghai AI Lab    <sup>5</sup>Microsoft Research Asia

## 1. Ablation study

**Channel-wise augmentation.** We investigate channel-wise quantization against its instance-wise counterpart. Under the data-agnostic assumption, the value range may vary significantly for different channels. Applying randomized quantization in a channel-wise fashion respects the unique physical property of each data channel. In addition, it adds greater complexity to the augmentations. This allows to create more diverse tasks and facilitates contrastive learning. Empirically, we find that channel-wise quantization is better than instance-wise quantization by a margin of 3.6% (67.9% vs. 64.3%).

## 2. Compactibility with fully augmented MoCo-v3

We append the randomized quantization to the full augmentation of MoCo-v3, leading to a marginal improvement from 68.9% to 69.0%.

## 3. Compactibility with fully supervised learning

We follow the ResNet50 supervised training recipe on ImageNet from TorchVision. We report the average performance over three runs. The baseline result is 75.56%. With additional randomized quantization augmentation, the result improves to 75.83%. This shows that randomized quantization is effective in supervised learning as well. However, its effect is not as strong as in self-supervised learning.

## 4. Detailed results on the DABS benchmark

## References

- [1] Alex Tamkin, Vincent Liu, Rongfei Lu, Daniel Fein, Colin Schultz, and Noah Goodman. Dabs: A domain-agnostic benchmark for self-supervised learning. *arXiv preprint arXiv:2111.12062*, 2021. [2](#)

---

\*Equal contribution. Work done during an internship at MSRA.

| Dataset            | Domain            | Metric        | None         | e-Mix [1]    | Ours         |
|--------------------|-------------------|---------------|--------------|--------------|--------------|
| CIFAR-10           | Images            | Accuracy      | 24.20        | 39.43        | <b>47.70</b> |
| Birds              | Images            | Accuracy      | 1.62         | 3.86         | <b>4.16</b>  |
| VGG Flower         | Images            | Accuracy      | 9.03         | 25.96        | <b>30.20</b> |
| DTD (Textures)     | Images            | Accuracy      | 7.39         | 8.83         | <b>10.90</b> |
| GTSRB (Traffic)    | Images            | Accuracy      | 14.33        | 65.07        | <b>86.80</b> |
| FGVC-Aircraft      | Images            | Accuracy      | 2.70         | 10.15        | <b>12.60</b> |
| LibriSpeech Sp. ID | Speech            | Accuracy      | 17.12        | 60.18        | <b>62.70</b> |
| VoxCeleb Sp. ID    | Speech            | Accuracy      | 0.59         | 2.43         | <b>2.69</b>  |
| AudioMNIST         | Speech            | Accuracy      | 33.13        | 80.35        | <b>82.80</b> |
| Google Speech      | Speech            | Accuracy      | 4.87         | 19.22        | <b>26.00</b> |
| Fluent Locations   | Speech            | Accuracy      | 62.09        | 60.93        | <b>65.20</b> |
| Fluent Actions     | Speech            | Accuracy      | 26.15        | 29.87        | <b>31.40</b> |
| Fluent Objects     | Speech            | Accuracy      | 30.13        | 39.89        | <b>40.80</b> |
| COLA               | English Text      | Pearson Corr. | 0.00         | <b>8.40</b>  | 8.27         |
| MNLI_Matched       | English Text      | Accuracy      | 35.80        | <b>37.80</b> | 36.70        |
| MNLI_Mismatched    | English Text      | Accuracy      | 36.60        | <b>37.50</b> | 37.00        |
| MRPC               | English Text      | Accuracy      | 68.40        | 66.20        | <b>68.90</b> |
| QNLI               | English Text      | Accuracy      | 57.70        | <b>57.90</b> | 57.40        |
| QQP                | English Text      | Accuracy      | 65.10        | 64.30        | <b>65.50</b> |
| RTE                | English Text      | Accuracy      | <b>54.50</b> | 51.30        | 52.70        |
| SST2               | English Text      | Accuracy      | 57.00        | <b>58.10</b> | 55.80        |
| STSB               | English Text      | Accuracy      | 4.20         | 11.40        | <b>13.70</b> |
| WNLI               | English Text      | Accuracy      | 43.60        | 47.90        | <b>50.70</b> |
| PAWS-X EN          | Multilingual Text | Accuracy      | <b>57.85</b> | 54.85        | 56.20        |
| PAWS-X FR          | Multilingual Text | Accuracy      | <b>57.80</b> | 55.90        | 55.90        |
| PAWS-X ES          | Multilingual Text | Accuracy      | <b>58.55</b> | 55.50        | 54.80        |
| PAWS-X DE          | Multilingual Text | Accuracy      | <b>58.85</b> | 56.50        | 55.50        |
| PAWS-X ZH          | Multilingual Text | Accuracy      | <b>57.35</b> | 55.35        | 54.20        |
| PAWS-X JP          | Multilingual Text | Accuracy      | <b>57.55</b> | 57.35        | 56.70        |
| PAWS-X KO          | Multilingual Text | Accuracy      | <b>58.80</b> | 57.70        | 56.60        |
| PAMAP2             | Sensor            | Accuracy      | 69.81        | 79.48        | <b>84.90</b> |
| CheXpert           | Chest X-Rays      | Avg. AUROC    | 68.14        | 72.40        | <b>73.40</b> |
| ChestX-ray8        | Chest X-Rays      | Avg. AUROC    | 57.00        | 63.00        | <b>64.70</b> |
| VQA                | Vision/Language   | Accuracy      | <b>57.50</b> | 48.90        | 54.40        |

Table 1. Detailed comparisons with e-Mix [1] on the DABS benchmark.
